# Supplementary material for: Cancer, Clinical Trials, and Canada: Our Contribution to Worldwide Randomized Controlled Trials
Source: MDPI journal article supplement (doi:10.3390/curroncol28020143), 2021-04-13
Supplement: s1 [file s1]

---

# Supplementary Materials: Cancer, Clinical Trials, and Canada: Our Contribution to Worldwide Randomized Controlled Trials

Shubham Sharma, J. Connor Wells, Wilma M. Hopman, Joseph C. Del Paggio, Bishal Gyawali, Nazik Hammad, Annette E. Hay, Christopher M. Booth

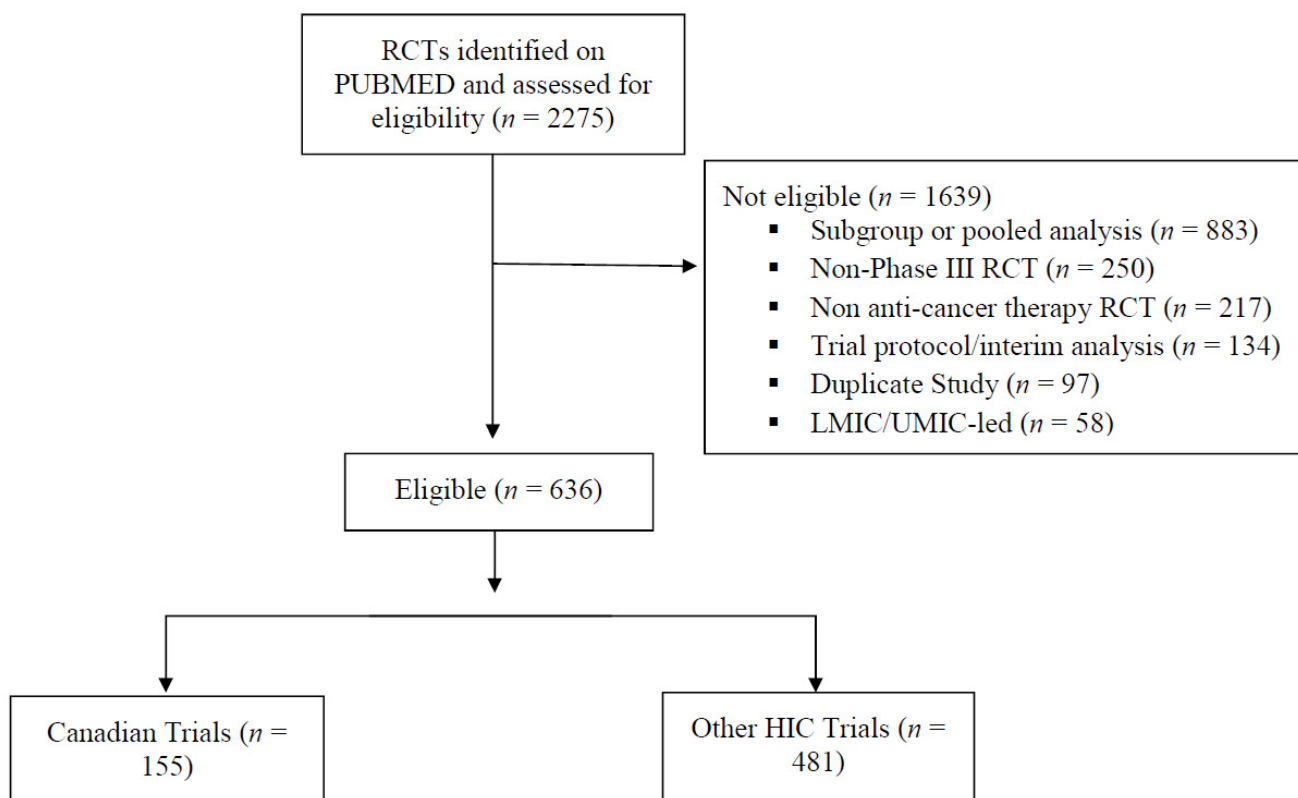

**Figure S1.** Results of search strategy for all oncology randomized controlled trials conducted during 2014–2017.
